# Supplementary material for: The π-conjugated P-flowers C16(PH)8 and C16(PF)8 are potential materials for organic n-type semiconductors
Source: Royal Society of Chemistry journal article supplement (doi:10.1039/c2cp42474f), 2012-01-01
Supplement: c2cp42474f.pdf [file c2cp42474f.pdf]

## Electronic Supporting Information

### The $\pi$ -Conjugated P-flowers $C_{16}(PH)_8$ and $C_{16}(PF)_8$ Are Potential Materials for Organic n-Type Semiconductors

Vu Thi Thu Huong<sup>a</sup>, Truong Ba Tai<sup>a</sup> and Minh Tho Nguyen<sup>a,b,1</sup>

<sup>a</sup>Department of Chemistry, University of Leuven, B-3001 Leuven, Belgium

<sup>b</sup>Institute for Computational Science and Technology (ICST), HoChiMinh City, Vietnam

**Supporting Information Available:** Table containing the Cartesian coordinates of the optimized geometries.

**Table S1.** Optimized geometries of the molecules and their anions and cations at the B3LYP/6-31+G(d,p) level. Cartesian coordinates in angstroms.

| Structure             | Geometry (Cartesian Coordinates) |              |              |              |
|-----------------------|----------------------------------|--------------|--------------|--------------|
| $C_{16}(PH)_8-D_{4d}$ | 6                                | 1.359582000  | 1.359582000  | 0.000000000  |
|                       | 6                                | 0.000000000  | 1.922697000  | 0.000000000  |
|                       | 6                                | 0.000000000  | -1.922697000 | 0.000000000  |
|                       | 6                                | -1.359582000 | 1.359582000  | 0.000000000  |
|                       | 6                                | -1.359582000 | -1.359582000 | 0.000000000  |
|                       | 6                                | -1.922697000 | 0.000000000  | 0.000000000  |
|                       | 6                                | 1.922697000  | 0.000000000  | 0.000000000  |
|                       | 6                                | 1.359582000  | -1.359582000 | 0.000000000  |
|                       | 6                                | 2.336897000  | -2.336897000 | 0.000000000  |
|                       | 6                                | 3.304905000  | 0.000000000  | 0.000000000  |
|                       | 6                                | 2.336897000  | 2.336897000  | 0.000000000  |
|                       | 6                                | 0.000000000  | 3.304905000  | 0.000000000  |
|                       | 6                                | -2.336897000 | 2.336897000  | 0.000000000  |
|                       | 6                                | -3.304905000 | 0.000000000  | 0.000000000  |
|                       | 6                                | -2.336897000 | -2.336897000 | 0.000000000  |
|                       | 6                                | 0.000000000  | -3.304905000 | 0.000000000  |
|                       | 15                               | 4.010831000  | 1.661340000  | 0.141231000  |
|                       | 15                               | 1.661340000  | 4.010831000  | -0.141231000 |
|                       | 15                               | -1.661340000 | 4.010831000  | 0.141231000  |
|                       | 15                               | -4.010831000 | 1.661340000  | -0.141231000 |
| 15                    | -4.010831000                     | -1.661340000 | 0.141231000  |              |
| 15                    | -1.661340000                     | -4.010831000 | -0.141231000 |              |

<sup>1</sup> Email: minh.nguyen@chem.kuleuven.be

|                         |    |              |              |              |
|-------------------------|----|--------------|--------------|--------------|
|                         | 15 | 1.661340000  | -4.010831000 | 0.141231000  |
|                         | 15 | 4.010831000  | -1.661340000 | -0.141231000 |
|                         | 1  | -1.854293000 | 4.476538000  | -1.190262000 |
|                         | 1  | 1.854293000  | 4.476538000  | 1.190262000  |
|                         | 1  | 4.476538000  | 1.854293000  | -1.190262000 |
|                         | 1  | 4.476538000  | -1.854293000 | 1.190262000  |
|                         | 1  | 1.854293000  | -4.476538000 | -1.190262000 |
|                         | 1  | -1.854293000 | -4.476538000 | 1.190262000  |
|                         | 1  | -4.476538000 | -1.854293000 | -1.190262000 |
|                         | 1  | -4.476538000 | 1.854293000  | 1.190262000  |
| $C_{16}(PH)_8-C_{8v}$   | 6  | 0.000000000  | 1.922993000  | 0.023010000  |
|                         | 6  | -1.359761000 | 1.359761000  | 0.023010000  |
|                         | 6  | 1.359761000  | -1.359761000 | 0.023010000  |
|                         | 6  | -1.922993000 | 0.000000000  | 0.023010000  |
|                         | 6  | 0.000000000  | -1.922993000 | 0.023010000  |
|                         | 6  | -1.359761000 | -1.359761000 | 0.023010000  |
|                         | 6  | 1.359761000  | 1.359761000  | 0.023010000  |
|                         | 6  | 1.922993000  | 0.000000000  | 0.023010000  |
|                         | 6  | 3.307584000  | 0.000000000  | 0.074701000  |
|                         | 6  | 2.338815000  | 2.338815000  | 0.074701000  |
|                         | 6  | 0.000000000  | 3.307584000  | 0.074701000  |
|                         | 6  | -2.338815000 | 2.338815000  | 0.074701000  |
|                         | 6  | -3.307584000 | 0.000000000  | 0.074701000  |
|                         | 6  | -2.338815000 | -2.338815000 | 0.074701000  |
|                         | 6  | 0.000000000  | -3.307584000 | 0.074701000  |
|                         | 6  | 2.338815000  | -2.338815000 | 0.074701000  |
|                         | 15 | 1.657911000  | 4.002550000  | -0.117965000 |
|                         | 15 | -1.657911000 | 4.002550000  | -0.117965000 |
|                         | 15 | -4.002550000 | 1.657911000  | -0.117965000 |
|                         | 15 | -4.002550000 | -1.657911000 | -0.117965000 |
|                         | 15 | -1.657911000 | -4.002550000 | -0.117965000 |
|                         | 15 | 1.657911000  | -4.002550000 | -0.117965000 |
|                         | 15 | 4.002550000  | -1.657911000 | -0.117965000 |
|                         | 15 | 4.002550000  | 1.657911000  | -0.117965000 |
|                         | 1  | -4.540067000 | 1.880557000  | 1.183212000  |
|                         | 1  | -1.880557000 | 4.540067000  | 1.183212000  |
|                         | 1  | 1.880557000  | 4.540067000  | 1.183212000  |
|                         | 1  | 4.540067000  | 1.880557000  | 1.183212000  |
|                         | 1  | 4.540067000  | -1.880557000 | 1.183212000  |
|                         | 1  | 1.880557000  | -4.540067000 | 1.183212000  |
|                         | 1  | -1.880557000 | -4.540067000 | 1.183212000  |
|                         | 1  | -4.540067000 | -1.880557000 | 1.183212000  |
| $C_{16}(PH)_8^+-D_{4d}$ | 6  | 1.793051000  | 0.652071000  | 0.005712000  |
|                         | 6  | 1.732712000  | -0.798713000 | 0.007086000  |
|                         | 6  | -1.732699000 | 0.798706000  | 0.007085000  |
|                         | 6  | 0.660498000  | -1.791601000 | -0.006905000 |

|                         |    |              |              |              |
|-------------------------|----|--------------|--------------|--------------|
|                         | 6  | -1.793041000 | -0.652072000 | 0.005761000  |
|                         | 6  | -0.808370000 | -1.729782000 | -0.008003000 |
|                         | 6  | 0.808372000  | 1.729778000  | -0.008069000 |
|                         | 6  | -0.660490000 | 1.791591000  | -0.006954000 |
|                         | 6  | -1.139331000 | 3.093523000  | -0.020502000 |
|                         | 6  | 1.394988000  | 2.987973000  | -0.023734000 |
|                         | 6  | 3.109764000  | 1.132088000  | 0.017525000  |
|                         | 6  | 3.003796000  | -1.386218000 | 0.021656000  |
|                         | 6  | 1.139330000  | -3.093528000 | -0.020417000 |
|                         | 6  | -1.394992000 | -2.987973000 | -0.023627000 |
|                         | 6  | -3.109762000 | -1.132085000 | 0.017615000  |
|                         | 6  | -3.003791000 | 1.386217000  | 0.021655000  |
|                         | 15 | 3.199007000  | 2.923160000  | -0.178770000 |
|                         | 15 | 4.350897000  | -0.180817000 | 0.203399000  |
|                         | 15 | 2.941246000  | -3.176459000 | -0.174032000 |
|                         | 15 | -0.181022000 | -4.298488000 | 0.150964000  |
|                         | 15 | -3.199016000 | -2.923161000 | -0.178632000 |
|                         | 15 | -4.350892000 | 0.180826000  | 0.203478000  |
|                         | 15 | -2.941248000 | 3.176451000  | -0.174113000 |
|                         | 15 | 0.181019000  | 4.298494000  | 0.150838000  |
|                         | 1  | 3.345177000  | -3.601354000 | 1.119216000  |
|                         | 1  | 4.896508000  | -0.203567000 | -1.109004000 |
|                         | 1  | 3.631472000  | 3.306651000  | 1.118507000  |
|                         | 1  | 0.209255000  | 4.946551000  | -1.110017000 |
|                         | 1  | -3.345178000 | 3.601405000  | 1.119116000  |
|                         | 1  | -4.896541000 | 0.203542000  | -1.108910000 |
|                         | 1  | -3.631472000 | -3.306595000 | 1.118665000  |
|                         | 1  | -0.209294000 | -4.946579000 | -1.109872000 |
| $C_{16}(PH)_8^+-C_{8v}$ | 6  | 1.353881000  | 1.345126000  | 0.008848000  |
|                         | 6  | 0.000000000  | 1.908870000  | 0.041580000  |
|                         | 6  | 0.000000000  | -1.908870000 | 0.041580000  |
|                         | 6  | -1.353881000 | 1.345126000  | 0.008848000  |
|                         | 6  | -1.353881000 | -1.345126000 | 0.008848000  |
|                         | 6  | -1.907315000 | 0.000000000  | -0.017077000 |
|                         | 6  | 1.907315000  | 0.000000000  | -0.017077000 |
|                         | 6  | 1.353881000  | -1.345126000 | 0.008848000  |
|                         | 6  | 2.344586000  | -2.328482000 | 0.079486000  |
|                         | 6  | 3.312998000  | 0.000000000  | 0.021206000  |
|                         | 6  | 2.344586000  | 2.328482000  | 0.079486000  |
|                         | 6  | 0.000000000  | 3.293855000  | 0.153612000  |
|                         | 6  | -2.344586000 | 2.328482000  | 0.079486000  |
|                         | 6  | -3.312998000 | 0.000000000  | 0.021206000  |
|                         | 6  | -2.344586000 | -2.328482000 | 0.079486000  |
|                         | 6  | 0.000000000  | -3.293855000 | 0.153612000  |
|                         | 15 | 4.015130000  | 1.658659000  | -0.150270000 |
|                         | 15 | 1.650875000  | 3.974897000  | -0.079026000 |

|                        |    |              |              |              |
|------------------------|----|--------------|--------------|--------------|
|                        | 15 | -1.650875000 | 3.974897000  | -0.079026000 |
|                        | 15 | -4.015130000 | 1.658659000  | -0.150270000 |
|                        | 15 | -4.015130000 | -1.658659000 | -0.150270000 |
|                        | 15 | -1.650875000 | -3.974897000 | -0.079026000 |
|                        | 15 | 1.650875000  | -3.974897000 | -0.079026000 |
|                        | 15 | 4.015130000  | -1.658659000 | -0.150270000 |
|                        | 1  | -1.968192000 | 4.574300000  | 1.167983000  |
|                        | 1  | 1.968192000  | 4.574300000  | 1.167983000  |
|                        | 1  | 4.579923000  | 1.832304000  | 1.143480000  |
|                        | 1  | 4.579923000  | -1.832304000 | 1.143480000  |
|                        | 1  | 1.968192000  | -4.574300000 | 1.167983000  |
|                        | 1  | -1.968192000 | -4.574300000 | 1.167983000  |
|                        | 1  | -4.579923000 | -1.832304000 | 1.143480000  |
|                        | 1  | -4.579923000 | 1.832304000  | 1.143480000  |
| $C_{16}(PH)_8^-D_{4d}$ | 6  | 1.352059000  | 1.352059000  | 0.000000000  |
|                        | 6  | 0.000000000  | 1.912060000  | 0.000000000  |
|                        | 6  | 0.000000000  | -1.912060000 | 0.000000000  |
|                        | 6  | -1.352059000 | 1.352059000  | 0.000000000  |
|                        | 6  | -1.352059000 | -1.352059000 | 0.000000000  |
|                        | 6  | -1.912060000 | 0.000000000  | 0.000000000  |
|                        | 6  | 1.912060000  | 0.000000000  | 0.000000000  |
|                        | 6  | 1.352059000  | -1.352059000 | 0.000000000  |
|                        | 6  | 2.335486000  | -2.335486000 | 0.000000000  |
|                        | 6  | 3.302913000  | 0.000000000  | 0.000000000  |
|                        | 6  | 2.335486000  | 2.335486000  | 0.000000000  |
|                        | 6  | 0.000000000  | 3.302913000  | 0.000000000  |
|                        | 6  | -2.335486000 | 2.335486000  | 0.000000000  |
|                        | 6  | -3.302913000 | 0.000000000  | 0.000000000  |
|                        | 6  | -2.335486000 | -2.335486000 | 0.000000000  |
|                        | 6  | 0.000000000  | -3.302913000 | 0.000000000  |
|                        | 15 | 4.012144000  | 1.661884000  | 0.103783000  |
|                        | 15 | 1.661884000  | 4.012144000  | -0.103783000 |
|                        | 15 | -1.661884000 | 4.012144000  | 0.103783000  |
|                        | 15 | -4.012144000 | 1.661884000  | -0.103783000 |
|                        | 15 | -4.012144000 | -1.661884000 | 0.103783000  |
|                        | 15 | -1.661884000 | -4.012144000 | -0.103783000 |
|                        | 15 | 1.661884000  | -4.012144000 | 0.103783000  |
|                        | 15 | 4.012144000  | -1.661884000 | -0.103783000 |
|                        | 1  | -1.848664000 | 4.463191000  | -1.247004000 |
|                        | 1  | 1.848664000  | 4.463191000  | 1.247004000  |
|                        | 1  | 4.463191000  | 1.848664000  | -1.247004000 |
|                        | 1  | 4.463191000  | -1.848664000 | 1.247004000  |
|                        | 1  | 1.848664000  | -4.463191000 | -1.247004000 |
|                        | 1  | -1.848664000 | -4.463191000 | 1.247004000  |
|                        | 1  | -4.463191000 | -1.848664000 | -1.247004000 |
|                        | 1  | -4.463191000 | 1.848664000  | 1.247004000  |

|                           |                         |             |             |             |
|---------------------------|-------------------------|-------------|-------------|-------------|
| $C_{16}(PH)_8^- - C_{8v}$ | 6                       | 0.00000000  | 1.91312000  | 0.04795600  |
|                           | 6                       | -1.35276900 | 1.35276900  | 0.04823400  |
|                           | 6                       | 1.35276900  | -1.35276900 | 0.04823400  |
|                           | 6                       | -1.91312000 | 0.00000000  | 0.04795600  |
|                           | 6                       | 0.00000000  | -1.91312000 | 0.04795600  |
|                           | 6                       | -1.35276900 | -1.35276900 | 0.04823400  |
|                           | 6                       | 1.35276900  | 1.35276900  | 0.04823400  |
|                           | 6                       | 1.91312000  | 0.00000000  | 0.04795600  |
|                           | 6                       | 3.30601700  | 0.00000000  | 0.06074400  |
|                           | 6                       | 2.33777500  | 2.33777500  | 0.06158000  |
|                           | 6                       | 0.00000000  | 3.30601700  | 0.06074400  |
|                           | 6                       | -2.33777500 | 2.33777500  | 0.06158000  |
|                           | 6                       | -3.30601700 | 0.00000000  | 0.06074400  |
|                           | 6                       | -2.33777500 | -2.33777500 | 0.06158000  |
|                           | 6                       | 0.00000000  | -3.30601700 | 0.06074400  |
|                           | 6                       | 2.33777500  | -2.33777500 | 0.06158000  |
|                           | 15                      | 1.65817900  | 4.00306900  | -0.12330000 |
|                           | 15                      | -1.65817900 | 4.00306900  | -0.12330000 |
|                           | 15                      | -4.00306900 | 1.65817900  | -0.12330000 |
|                           | 15                      | -4.00306900 | -1.65817900 | -0.12330000 |
|                           | 15                      | -1.65817900 | -4.00306900 | -0.12330000 |
|                           | 15                      | 1.65817900  | -4.00306900 | -0.12330000 |
|                           | 15                      | 4.00306900  | -1.65817900 | -0.12330000 |
|                           | 15                      | 4.00306900  | 1.65817900  | -0.12330000 |
|                           | 1                       | -4.53474300 | 1.87756300  | 1.19396300  |
|                           | 1                       | -1.87756300 | 4.53474300  | 1.19396300  |
|                           | 1                       | 1.87756300  | 4.53474300  | 1.19396300  |
|                           | 1                       | 4.53474300  | 1.87756300  | 1.19396300  |
|                           | 1                       | 4.53474300  | -1.87756300 | 1.19396300  |
|                           | 1                       | 1.87756300  | -4.53474300 | 1.19396300  |
|                           | 1                       | -1.87756300 | -4.53474300 | 1.19396300  |
|                           | 1                       | -4.53474300 | -1.87756300 | 1.19396300  |
|                           | $C_{16}(PF)_8 - D_{4d}$ | 6           | 0.73992000  | 1.78632400  |
| 6                         |                         | -0.73992000 | 1.78632400  | 0.00000000  |
| 6                         |                         | 0.73992000  | -1.78632400 | 0.00000000  |
| 6                         |                         | -1.78632400 | 0.73992000  | 0.00000000  |
| 6                         |                         | -0.73992000 | -1.78632400 | 0.00000000  |
| 6                         |                         | -1.78632400 | -0.73992000 | 0.00000000  |
| 6                         |                         | 1.78632400  | 0.73992000  | 0.00000000  |
| 6                         |                         | 1.78632400  | -0.73992000 | 0.00000000  |
| 6                         |                         | 3.05750100  | -1.26645900 | 0.00000000  |
| 6                         |                         | 3.05750100  | 1.26645900  | 0.00000000  |
| 6                         |                         | 1.26645900  | 3.05750100  | 0.00000000  |
| 6                         |                         | -1.26645900 | 3.05750100  | 0.00000000  |
| 6                         |                         | -3.05750100 | 1.26645900  | 0.00000000  |
| 6                         |                         | -3.05750100 | -1.26645900 | 0.00000000  |

|                       |    |              |              |              |
|-----------------------|----|--------------|--------------|--------------|
|                       | 6  | -1.266459000 | -3.057501000 | 0.000000000  |
|                       | 6  | 1.266459000  | -3.057501000 | 0.000000000  |
|                       | 15 | 3.060636000  | 3.060636000  | 0.263067000  |
|                       | 15 | 0.000000000  | 4.328393000  | -0.263067000 |
|                       | 15 | -3.060636000 | 3.060636000  | 0.263067000  |
|                       | 15 | -4.328393000 | 0.000000000  | -0.263067000 |
|                       | 15 | -3.060636000 | -3.060636000 | 0.263067000  |
|                       | 15 | 0.000000000  | -4.328393000 | -0.263067000 |
|                       | 15 | 3.060636000  | -3.060636000 | 0.263067000  |
|                       | 15 | 4.328393000  | 0.000000000  | -0.263067000 |
|                       | 9  | 5.224690000  | 0.000000000  | 1.089986000  |
|                       | 9  | 0.000000000  | 5.224690000  | 1.089986000  |
|                       | 9  | 0.000000000  | -5.224690000 | 1.089986000  |
|                       | 9  | -5.224690000 | 0.000000000  | 1.089986000  |
|                       | 9  | -3.694413000 | -3.694413000 | -1.089986000 |
|                       | 9  | 3.694413000  | -3.694413000 | -1.089986000 |
|                       | 9  | -3.694413000 | 3.694413000  | -1.089986000 |
|                       | 9  | 3.694413000  | 3.694413000  | -1.089986000 |
| $C_{16}(PF)_8-C_{8v}$ | 6  | -1.929683000 | 0.000000000  | -0.149905000 |
|                       | 6  | -1.364492000 | -1.364492000 | -0.149905000 |
|                       | 6  | 1.364492000  | 1.364492000  | -0.149905000 |
|                       | 6  | 0.000000000  | -1.929683000 | -0.149905000 |
|                       | 6  | 1.929683000  | 0.000000000  | -0.149905000 |
|                       | 6  | 1.364492000  | -1.364492000 | -0.149905000 |
|                       | 6  | -1.364492000 | 1.364492000  | -0.149905000 |
|                       | 6  | 0.000000000  | 1.929683000  | -0.149905000 |
|                       | 6  | 0.000000000  | 3.313046000  | -0.083848000 |
|                       | 6  | -2.342677000 | 2.342677000  | -0.083848000 |
|                       | 6  | -3.313046000 | 0.000000000  | -0.083848000 |
|                       | 6  | -2.342677000 | -2.342677000 | -0.083848000 |
|                       | 6  | 0.000000000  | -3.313046000 | -0.083848000 |
|                       | 6  | 2.342677000  | -2.342677000 | -0.083848000 |
|                       | 6  | 3.313046000  | 0.000000000  | -0.083848000 |
|                       | 6  | 2.342677000  | 2.342677000  | -0.083848000 |
|                       | 15 | -3.976476000 | 1.647110000  | -0.418178000 |
|                       | 15 | -3.976476000 | -1.647110000 | -0.418178000 |
|                       | 15 | -1.647110000 | -3.976476000 | -0.418178000 |
|                       | 15 | 1.647110000  | -3.976476000 | -0.418178000 |
|                       | 15 | 3.976476000  | -1.647110000 | -0.418178000 |
|                       | 15 | 3.976476000  | 1.647110000  | -0.418178000 |
|                       | 15 | 1.647110000  | 3.976476000  | -0.418178000 |
|                       | 15 | -1.647110000 | 3.976476000  | -0.418178000 |
|                       | 9  | -4.902870000 | 2.030835000  | 0.852799000  |
|                       | 9  | -2.030835000 | 4.902870000  | 0.852799000  |
|                       | 9  | 2.030835000  | 4.902870000  | 0.852799000  |
|                       | 9  | 4.902870000  | 2.030835000  | 0.852799000  |

|                         |    |              |              |              |
|-------------------------|----|--------------|--------------|--------------|
|                         | 9  | 4.902870000  | -2.030835000 | 0.852799000  |
|                         | 9  | 2.030835000  | -4.902870000 | 0.852799000  |
|                         | 9  | -2.030835000 | -4.902870000 | 0.852799000  |
|                         | 9  | -4.902870000 | -2.030835000 | 0.852799000  |
| $C_{16}(PF)_8^+-D_{4d}$ | 6  | 0.732657000  | 1.768790000  | 0.000000000  |
|                         | 6  | -0.732657000 | 1.768790000  | 0.000000000  |
|                         | 6  | 0.732657000  | -1.768790000 | 0.000000000  |
|                         | 6  | -1.768790000 | 0.732657000  | 0.000000000  |
|                         | 6  | -0.732657000 | -1.768790000 | 0.000000000  |
|                         | 6  | -1.768790000 | -0.732657000 | 0.000000000  |
|                         | 6  | 1.768790000  | 0.732657000  | 0.000000000  |
|                         | 6  | 1.768790000  | -0.732657000 | 0.000000000  |
|                         | 6  | 3.049072000  | -1.262967000 | 0.000000000  |
|                         | 6  | 3.049072000  | 1.262967000  | 0.000000000  |
|                         | 6  | 1.262967000  | 3.049072000  | 0.000000000  |
|                         | 6  | -1.262967000 | 3.049072000  | 0.000000000  |
|                         | 6  | -3.049072000 | 1.262967000  | 0.000000000  |
|                         | 6  | -3.049072000 | -1.262967000 | 0.000000000  |
|                         | 6  | -1.262967000 | -3.049072000 | 0.000000000  |
|                         | 6  | 1.262967000  | -3.049072000 | 0.000000000  |
|                         | 15 | 3.050864000  | 3.050864000  | 0.356205000  |
|                         | 15 | 0.000000000  | 4.314573000  | -0.356205000 |
|                         | 15 | -3.050864000 | 3.050864000  | 0.356205000  |
|                         | 15 | -4.314573000 | 0.000000000  | -0.356205000 |
|                         | 15 | -3.050864000 | -3.050864000 | 0.356205000  |
|                         | 15 | 0.000000000  | -4.314573000 | -0.356205000 |
|                         | 15 | 3.050864000  | -3.050864000 | 0.356205000  |
|                         | 15 | 4.314573000  | 0.000000000  | -0.356205000 |
|                         | 9  | 5.291518000  | 0.000000000  | 0.922707000  |
|                         | 9  | 0.000000000  | -5.291518000 | 0.922707000  |
|                         | 9  | 0.000000000  | 5.291518000  | 0.922707000  |
|                         | 9  | -5.291518000 | 0.000000000  | 0.922707000  |
|                         | 9  | -3.741668000 | 3.741668000  | -0.922707000 |
|                         | 9  | -3.741668000 | -3.741668000 | -0.922707000 |
|                         | 9  | 3.741668000  | -3.741668000 | -0.922707000 |
|                         | 9  | 3.741668000  | 3.741668000  | -0.922707000 |
| $C_{16}(PF)_8^+-C_{8v}$ | 6  | 1.358547000  | 1.353226000  | -0.181363000 |
|                         | 6  | 0.000000000  | 1.918983000  | -0.128937000 |
|                         | 6  | 0.000000000  | -1.918983000 | -0.128937000 |
|                         | 6  | -1.358547000 | 1.353226000  | -0.181363000 |
|                         | 6  | -1.358547000 | -1.353226000 | -0.181363000 |
|                         | 6  | -1.913495000 | 0.000000000  | -0.226709000 |
|                         | 6  | 1.913495000  | 0.000000000  | -0.226709000 |
|                         | 6  | 1.358547000  | -1.353226000 | -0.181363000 |
|                         | 6  | 2.352253000  | -2.328339000 | -0.078409000 |
|                         | 6  | 3.312247000  | 0.000000000  | -0.183559000 |

|                        |    |              |              |              |
|------------------------|----|--------------|--------------|--------------|
|                        | 6  | 2.352253000  | 2.328339000  | -0.078409000 |
|                        | 6  | 0.000000000  | 3.300412000  | 0.041429000  |
|                        | 6  | -2.352253000 | 2.328339000  | -0.078409000 |
|                        | 6  | -3.312247000 | 0.000000000  | -0.183559000 |
|                        | 6  | -2.352253000 | -2.328339000 | -0.078409000 |
|                        | 6  | 0.000000000  | -3.300412000 | 0.041429000  |
|                        | 15 | 3.993732000  | 1.655794000  | -0.462644000 |
|                        | 15 | 1.635419000  | 3.951410000  | -0.333591000 |
|                        | 15 | -1.635419000 | 3.951410000  | -0.333591000 |
|                        | 15 | -3.993732000 | 1.655794000  | -0.462644000 |
|                        | 15 | -3.993732000 | -1.655794000 | -0.462644000 |
|                        | 15 | -1.635419000 | -3.951410000 | -0.333591000 |
|                        | 15 | 1.635419000  | -3.951410000 | -0.333591000 |
|                        | 15 | 3.993732000  | -1.655794000 | -0.462644000 |
|                        | 9  | 2.109163000  | 4.915611000  | 0.851419000  |
|                        | 9  | -2.109163000 | 4.915611000  | 0.851419000  |
|                        | 9  | -4.918288000 | 1.962900000  | 0.814746000  |
|                        | 9  | -4.918288000 | -1.962900000 | 0.814746000  |
|                        | 9  | -2.109163000 | -4.915611000 | 0.851419000  |
|                        | 9  | 2.109163000  | -4.915611000 | 0.851419000  |
|                        | 9  | 4.918288000  | -1.962900000 | 0.814746000  |
|                        | 9  | 4.918288000  | 1.962900000  | 0.814746000  |
| $C_{16}(PF)_8^-D_{4d}$ | 6  | 0.734997000  | 1.774439000  | 0.000000000  |
|                        | 6  | -0.734997000 | 1.774439000  | 0.000000000  |
|                        | 6  | 0.734997000  | -1.774439000 | 0.000000000  |
|                        | 6  | -1.774439000 | 0.734997000  | 0.000000000  |
|                        | 6  | -0.734997000 | -1.774439000 | 0.000000000  |
|                        | 6  | -1.774439000 | -0.734997000 | 0.000000000  |
|                        | 6  | 1.774439000  | 0.734997000  | 0.000000000  |
|                        | 6  | 1.774439000  | -0.734997000 | 0.000000000  |
|                        | 6  | 3.052243000  | -1.264281000 | 0.000000000  |
|                        | 6  | 3.052243000  | 1.264281000  | 0.000000000  |
|                        | 6  | 1.264281000  | 3.052243000  | 0.000000000  |
|                        | 6  | -1.264281000 | 3.052243000  | 0.000000000  |
|                        | 6  | -3.052243000 | 1.264281000  | 0.000000000  |
|                        | 6  | -3.052243000 | -1.264281000 | 0.000000000  |
|                        | 6  | -1.264281000 | -3.052243000 | 0.000000000  |
|                        | 6  | 1.264281000  | -3.052243000 | 0.000000000  |
|                        | 15 | 3.068253000  | 3.068253000  | 0.173735000  |
|                        | 15 | 0.000000000  | 4.339164000  | -0.173735000 |
|                        | 15 | -3.068253000 | 3.068253000  | 0.173735000  |
|                        | 15 | -4.339164000 | 0.000000000  | -0.173735000 |
|                        | 15 | -3.068253000 | -3.068253000 | 0.173735000  |
|                        | 15 | 0.000000000  | -4.339164000 | -0.173735000 |
|                        | 15 | 3.068253000  | -3.068253000 | 0.173735000  |
|                        | 15 | 4.339164000  | 0.000000000  | -0.173735000 |



|                           |    |              |              |              |
|---------------------------|----|--------------|--------------|--------------|
|                           | 9  | 0.000000000  | -5.112418000 | 1.276920000  |
|                           | 9  | -5.112418000 | 0.000000000  | 1.276920000  |
|                           | 9  | 0.000000000  | 5.112418000  | 1.276920000  |
|                           | 9  | 5.112418000  | 0.000000000  | 1.276920000  |
|                           | 9  | 3.615025000  | 3.615025000  | -1.276920000 |
|                           | 9  | 3.615025000  | -3.615025000 | -1.276920000 |
|                           | 9  | -3.615025000 | -3.615025000 | -1.276920000 |
|                           | 9  | -3.615025000 | 3.615025000  | -1.276920000 |
| $C_{16}(PF)_8^- - C_{8v}$ | 6  | -1.917641000 | 0.000000000  | -0.143403000 |
|                           | 6  | -1.355977000 | -1.355977000 | -0.143403000 |
|                           | 6  | 1.355977000  | 1.355977000  | -0.143403000 |
|                           | 6  | 0.000000000  | -1.917641000 | -0.143403000 |
|                           | 6  | 1.917641000  | 0.000000000  | -0.143403000 |
|                           | 6  | 1.355977000  | -1.355977000 | -0.143403000 |
|                           | 6  | -1.355977000 | 1.355977000  | -0.143403000 |
|                           | 6  | 0.000000000  | 1.917641000  | -0.143403000 |
|                           | 6  | 0.000000000  | 3.308354000  | -0.123838000 |
|                           | 6  | -2.339360000 | 2.339360000  | -0.123838000 |
|                           | 6  | -3.308354000 | 0.000000000  | -0.123838000 |
|                           | 6  | -2.339360000 | -2.339360000 | -0.123838000 |
|                           | 6  | 0.000000000  | -3.308354000 | -0.123838000 |
|                           | 6  | 2.339360000  | -2.339360000 | -0.123838000 |
|                           | 6  | 3.308354000  | 0.000000000  | -0.123838000 |
|                           | 6  | 2.339360000  | 2.339360000  | -0.123838000 |
|                           | 15 | -3.978694000 | 1.648029000  | -0.431421000 |
|                           | 15 | -3.978694000 | -1.648029000 | -0.431421000 |
|                           | 15 | -1.648029000 | -3.978694000 | -0.431421000 |
|                           | 15 | 1.648029000  | -3.978694000 | -0.431421000 |
|                           | 15 | 3.978694000  | -1.648029000 | -0.431421000 |
|                           | 15 | 3.978694000  | 1.648029000  | -0.431421000 |
|                           | 15 | 1.648029000  | 3.978694000  | -0.431421000 |
|                           | 15 | -1.648029000 | 3.978694000  | -0.431421000 |
|                           | 9  | -4.863530000 | 2.014540000  | 0.897197000  |
|                           | 9  | -2.014540000 | 4.863530000  | 0.897197000  |
|                           | 9  | 2.014540000  | 4.863530000  | 0.897197000  |
|                           | 9  | 4.863530000  | 2.014540000  | 0.897197000  |
|                           | 9  | 4.863530000  | -2.014540000 | 0.897197000  |
|                           | 9  | 2.014540000  | -4.863530000 | 0.897197000  |
|                           | 9  | -2.014540000 | -4.863530000 | 0.897197000  |
|                           | 9  | -4.863530000 | -2.014540000 | 0.897197000  |
